# Supplementary material for: Development of multiplex real-time PCR for simultaneous detection of common fungal pathogens in invasive mycoses
Source: PeerJ. 2024 Oct 17;12:e18238. doi: 10.7717/peerj.18238 (PMC11491059; doi:10.7717/peerj.18238)
Supplement: Supplemental Information 3 [file peerj-12-18238-s003.xls]

## Sheet: Sheet1
ITEM TO CHECK	IMPORTANCE	CHECKLIST
EXPERIMENTAL DESIGN
Definition of experimental and control groups	E	X 65
Number within each group	E	X 66
Assay carried out by core lab or investigator's lab?	D
Acknowledgement of authors' contributions	D
SAMPLE
Description	E	X 61
Volume/mass of sample processed	D	X 65
Microdissection or macrodissection	E	X 64
Processing procedure	E	X 60-69
If frozen - how and how quickly?	E	X 60-69
If fixed - with what, how quickly?	E	X 60-69
Sample storage conditions and duration (especially for FFPE samples)	E	X 60-69
NUCLEIC ACID EXTRACTION
Procedure and/or instrumentation	E	X 71-88
Name of kit and details of any modifications	E	X 87
Source of additional reagents used	D	X 73
Details of DNase or RNAse treatment	E	X 87
Contamination assessment (DNA or RNA)	E	X 88
Nucleic acid quantification	E	X 88
Instrument and method	E	X 88
Purity (A260/A280)	D
Yield	D
RNA integrity method/instrument	E	N/A
RIN/RQI or Cq of 3' and 5' transcripts	E	N/A
Electrophoresis traces	D
Inhibition testing (Cq dilutions, spike or other)	E	N/A
REVERSE TRANSCRIPTION
Complete reaction conditions	E	N/A
Amount of RNA and reaction volume	E	N/A
Priming oligonucleotide (if using GSP) and concentration	E	N/A
Reverse transcriptase and concentration	E	N/A
Temperature and time	E	N/A
Manufacturer of reagents and catalogue numbers	D	N/A
Cqs with and without RT	D*	N/A
Storage conditions of cDNA	D	N/A
qPCR TARGET INFORMATION
If multiplex, efficiency and LOD of each assay.	E	X 116-126
Sequence accession number	E	X 93
Location of amplicon	D
Amplicon length	E	X 101 (Table1)
In silico specificity screen (BLAST, etc)	E	X 95
Pseudogenes, retropseudogenes or other homologs?	D
Sequence alignment	D
Secondary structure analysis of amplicon	D
Location of each primer by exon or intron (if applicable)	E	N/A
What splice variants are targeted?	E	N/A
qPCR OLIGONUCLEOTIDES
Primer sequences	E	X 101 (Table1)
RTPrimerDB Identification Number	D
Probe sequences	D**
Location and identity of any modifications	E	X 101 (Table1)
Manufacturer of oligonucleotides	D
Purification method	D
qPCR PROTOCOL
Complete reaction conditions	E	X 103-114
Reaction volume and amount of cDNA/DNA	E	X 116-117
Primer, (probe), Mg++ and dNTP concentrations	E	X 106
Polymerase identity and concentration	E	X 104
Buffer/kit identity and manufacturer	E	X 104
Exact chemical constitution of the buffer	D
Additives (SYBR Green I, DMSO, etc.)	E	N/A
Manufacturer of plates/tubes and catalog number	D
Complete thermocycling parameters	E	X 107-108
Reaction setup (manual/robotic)	D	X 105
Manufacturer of qPCR instrument	E	X 103-105
qPCR VALIDATION
Evidence of optimisation (from gradients)	D
Specificity (gel, sequence, melt, or digest)	E	X 116-132
For SYBR Green I, Cq of the NTC	E	N/A
Standard curves with slope and y-intercept	E	X 118-132
PCR efficiency calculated from slope	E	X 110-114
Confidence interval for PCR efficiency or standard error	D	X 110-114
r2 of standard curve	E	X 110-114
Linear dynamic range	E	X 110-114
Cq variation at lower limit	E	X 110-114
Confidence intervals throughout range	D	X 110-114
Evidence for limit of detection	E	X 110-114
If multiplex, efficiency and LOD of each assay.	E	X 110-114
DATA ANALYSIS
qPCR analysis program (source, version)	E	X 103-105
Cq method determination	E	X 110-114
Outlier identification and disposition	E	X 111
Results of NTCs	E	X 111
Justification of number and choice of reference genes	E	X 92
Description of normalisation method	E	X 92
Number and concordance of biological replicates	D
Number and stage (RT or qPCR) of technical replicates	E	X 134-137
Repeatability (intra-assay variation)	E	X 134
Reproducibility (inter-assay variation, %CV)	D
Power analysis	D
Statistical methods for result significance	E	X 113
Software (source, version)	E	X 105
Cq or raw data submission using RDML	D
Table 1. MIQE checklist for authors, reviewers and editors. All essential information (E) must be submitted with the manuscript. Desirable
information (D) should be submitted if available. If using primers obtained from RTPrimerDB, information on qPCR target, oligonucleotides,
protocols and validation is available from that source.
*: Assessing the absence of DNA using a no RT assay is essential when first extracting RNA. Once the sample has been validated as
RDNA-free, inclusion of a no-RT control is desirable, but no longer essential.
**: Disclosure of the probe sequence is highly desirable and strongly encouraged. However, since not all commercial pre-designed assay
vendors provide this information, it cannot be an essential requirement. Use of such assays is advised against.
N/A for reverse transcriptase section since the assay is just real-time PCR assay and dealing with DNA samples
