# Supplementary material for: Development of multiplex real-time PCR for simultaneous detection of common fungal pathogens in invasive mycoses
Source: PeerJ. 2024 Oct 17;12:e18238. doi: 10.7717/peerj.18238 (PMC11491059; doi:10.7717/peerj.18238)
Supplement: Supplemental Information 4 [file peerj-12-18238-s004.xlsx]

## Sheet: A. fumigatus
multiplex
A. fumigatus
concentration of GMT	DNA copies no/ml	Log DNA copies /ml	Cq Mean
100 ng/ml	3180656000	9.50252	24.02
10 ng/ml	318065600	8.50252	27.38
1 ng/ml	31806560	7.50252	30.1
100 pg/ml	3180656	6.50252	35.09
A. terreus
concentration of GMT	DNA copies no/ml	Log DNA copies /ml	mean Cq
100 ng/ml	3051510000	9.48451	29.19
10 ng/ml	305151000	8.48451	31.36
1 ng/ml	30515100	7.48451	35.54
100 pg/ml	3051510	6.48451	38.54
C. albicans
concentration of GMT	DNA copies no/ml	Log DNA copies /ml	mean Cq
100 ng/ml	6617582000	9.8207	23.97
10 ng/ml	661758200	8.8207	27.87
1 ng/ml	66175820	7.8207	31.02
100 pg/ml	6617582	6.8207	34.9
C. glabrata
concentration of GMT	DNA copies no/ml	Log DNA copies /ml	mean Cq
100 ng/ml	7411692000	9.86992	23.02
10 ng/ml	741169200	8.86992	25.11
1 ng/ml	74116920	7.86992	29.13
100 pg/ml	7411692	6.86992	33.49
